1 **Harnessing genetic diversity in the USDA pea (*Pisum sativum* L.) germplasm collection**  
2 **through genomic prediction**

3 Md. Abdullah Al Bari<sup>1</sup>, Ping Zheng<sup>3</sup>, Indalecio Viera<sup>1</sup>, Hannah Worrall<sup>2</sup>, Stephen Szwiec<sup>2</sup>, Yu  
4 Ma<sup>3</sup>, Dorrie Main<sup>3</sup>, Clarice J. Coyne<sup>4</sup>, Rebecca McGee<sup>5</sup>, and Nonoy Bandillo<sup>1\*</sup>

5 <sup>1</sup> Department of Plant Sciences, North Dakota State University, Fargo, ND 58108-6050, USA

6 <sup>2</sup> NDSU North Central Research Extension Center, 5400 Highway 83 South Minot, ND 58701,  
7 USA

8 <sup>3</sup> Department of Horticulture, Washington State University, Pullman, WA 99164, USA

9 <sup>4</sup> USDA-ARS Plant Germplasm Introduction and Testing, Washington State University,  
10 Pullman, WA 99164, USA

11 <sup>5</sup> USDA-ARS Grain Legume Genetics and Physiology Research, Pullman, WA 99164, USA

12 Corresponding Author: Nonoy Bandillo, \*email: nonoy.bandillo@ndsu.edu

13 **Abstract**

14 Phenotypic evaluation and efficient utilization of germplasm collections can be time-intensive,  
15 laborious, and expensive. However, with the plummeting costs of next-generation sequencing  
16 and the addition of genomic selection to the plant breeder's toolbox, we now can more efficiently  
17 tap the genetic diversity within large germplasm collections. In this study, we applied and  
18 evaluated genomic selection's potential to a set of 482 pea accessions – genotyped with 30,600  
19 single nucleotide polymorphic (SNP) markers and phenotyped for seed yield and yield-related  
20 components – for enhancing selection of accessions from the USDA Pea Germplasm Collection.  
21 Genomic prediction models and several factors affecting predictive ability were evaluated in a  
22 series of cross-validation schemes across complex traits. Different genomic prediction models  
23 gave similar results, with predictive ability across traits ranging from 0.23 to 0.60, with no model  
24 working best across all traits. Increasing the training population size improved the predictive  
25 ability of most traits, including seed yield. Predictive abilities increased and reached a plateau  
26 with increasing number of markers presumably due to extensive linkage disequilibrium in the  
27 pea genome. Accounting for population structure effects did not significantly boost predictive  
28 ability, but we observed a slight improvement in seed yield. By applying the best genomic  
29 prediction model (e.g., RR-BLUP), we then examined the distribution of genotyped but  
30 nonphenotyped accessions and the reliability of genomic estimated breeding values (GEBV).  
31 The distribution of GEBV suggested that none of the nonphenotyped accessions were expected  
32 to perform outside the range of the phenotyped accessions. Desirable breeding values with higher  
33 reliability can be used to identify and screen favorable germplasm accessions. Expanding the  
34 training set and incorporating additional orthogonal information (e.g., transcriptomics,  
35 proteomics, metabolomics, physiological traits, etc.) into the genomic prediction framework  
36 could enhance prediction accuracy.

37 **Keywords:** genomic selection, genomic prediction, reliability criteria, germplasm accessions,  
38 pea (*Pisum sativum* L.), next-generation sequencing

39

40

41

## 42 Introduction

43 Pea (*Pisum sativum* L.) is a vitally important pulse crop that provides protein (15.8-32.1%),  
44 vitamins, minerals, and fibers. Pea consumption has cardiovascular benefits as it is rich in  
45 potassium, folate, and digestible fibers, which promote gut health and prevent certain cancers  
46 (Mudryj et al., 2014; Tayeh et al., 2015). Considering the health benefits of pea, the US  
47 Department of Agriculture recommends regular pulses consumption, including peas, to promote  
48 human health and wellbeing (<http://www.choosemyplate.gov/>). In 2019, more than 446,000  
49 hectares of edible dry pea were planted with production totaling 1,013,600 tonnes in the USA,  
50 making it the fourth-largest legume crop (<http://www.fao.org>) (USDA, 2020). Growing peas also  
51 help maintain soil health and productivity by fixing atmospheric nitrogen (Burstin et al., 2015).  
52 Recently, the pea protein has emerged as a frontrunner and showed the most promise in the  
53 growing alternative protein market. The Beyond Meat burger is a perfect example of a pea  
54 protein product gaining traction in the growing market. About 20-gram protein (17.5%) in each  
55 burger comes from pea ([https://www.nasdaq.com/articles/heres-why-nows-thetime-to-buy-](https://www.nasdaq.com/articles/heres-why-nows-thetime-to-buy-beyond-meat-stock-2019-12-05)  
56 [beyond-meat-stock-2019-12-05](https://www.nasdaq.com/articles/heres-why-nows-thetime-to-buy-beyond-meat-stock-2019-12-05)). Another product made from pea, Ripptein, is a non-dairy milk  
57 product of pea protein that is gaining tremendous interest as an alternative dairy product  
58 (<https://www.ripplefoods.com/ripptein/>). Additionally, peas are gaining attention in the pet food  
59 market as it is grain-free and an excellent source of essential amino acids required by cats and  
60 dogs (PetfoodIndustry.com) (Facciolongo et al., 2014). As the demand for pea increases,  
61 particularly in the growing alternative protein market, genetic diversity expansion is needed to  
62 hasten the current rate of genetic gain in pea (Vandemark et al., 2014).

63 Germplasm collections serve as an essential source of variation for germplasm enhancement that  
64 can sustain long-term genetic gain in breeding programs. The USDA *Pisum* collection, held at  
65 the Western Regional Plant Introduction Station at Washington State University, is a good  
66 starting point to investigate functional genetic variation useful for applied breeding efforts. To  
67 date, this collection consists of 6,192 accessions plus a Pea Genetic Stocks collection of 712  
68 accessions. From this collection, the USDA core collection comprised of 504 accessions was  
69 assembled to represent ~18% of all USDA pea accessions at the time of construction (Simon and  
70 Hannan 1995; Coyne et al., 2005). Subsequently, single-seed descent derived homozygous  
71 accessions were developed from a subset of the core to form the 'Pea Single Plant'-derived (PSP)  
72 collection. The PSP is used to facilitate the collection's genetic analysis (Cheng et al., 2015). The  
73 USDA Pea Single Plant Plus Collection (PSPPC) was assembled and included the PSP and  
74 Chinese accessions and field, snap and snow peas from US public pea-breeding programs  
75 (Holdsworth et al., 2017).

76 Genomic selection (GS) takes advantage of high-density genomic data that holds a promise to  
77 increase the rate of genetic gain (Meuwissen et al., 2001). As genotyping costs have significantly  
78 declined relative to current phenotyping costs, GS has become an attractive option as a selection  
79 decision tool to evaluate accessions in extensive germplasm collections. A genomic prediction  
80 approach could use only genomic data to predict each accession's breeding value in the collection  
81 (Meuwissen et al., 2001; Habier et al., 2007; VanRaden, 2008). The predicted values would  
82 significantly increase the value of accessions in germplasm collections by giving breeders a  
83 means to identify those favorable accessions meriting their attention from the thousand available  
84 accessions in germplasm collections (Longin et al., 2014; Crossa et al., 2016; Jarquin et al.,  
85 2016). Several studies used the genomic prediction approach to harness diversity in germplasm  
86 collections, including lentil (Haile et al., 2020), soybean (Jarquin et al., 2016), wheat (Crossa et

87 al., 2016), rice (Spindel et al., 2015), sorghum (Yu et al., 2016), maize (Gorjanc et al., 2016), and  
88 potato (Bethke et al., 2019). A pea genomic selection study for drought-prone Italian  
89 environment revealed increased selection accuracy of pea lines (Annicchiarico et al., 2019;  
90 Annicchiarico et al., 2020). To the best of our knowledge, no such studies have been performed  
91 using the USDA Pea Germplasm Collection, but a relevant study has been conducted using a  
92 diverse pea germplasm set comprised of more than 370 accessions genotyped with a limited  
93 number of markers (Burstin et al., 2015; Tayeh et al., 2015).

94 To date, methods to sample and utilize an extensive genetic resource like germplasm collections  
95 remain a challenge. In this study, a genomic prediction approach targeting complex traits,  
96 including seed yield and phenology, was evaluated to exploit diversity contained in the USDA  
97 Pea Germplasm Collection. No research has been conducted before on genomic prediction for  
98 the genetic exploration of the USDA Pea Germplasm Collection. Different cross-validation  
99 schemes were used to answer essential questions surrounding the efficient implementation of  
100 genomic prediction and selection, including determining best prediction models, optimum  
101 population size and number of markers, and impact of accounting population structure into  
102 genomic prediction framework. We then examined the distribution of all nonphenotyped  
103 accessions using SNP information in the collection by applying genomic prediction models and  
104 estimated reliability criteria of genomic estimated breeding values for the assessed traits.

## 105 **Material and Methods**

### 106 **Plant materials**

107 A total of 482 USDA germplasm accession were used in this study, including the Pea Single  
108 Plant Plus Collection (Pea PSP) comprised of 292 pea germplasm accessions (Cheng et al.,  
109 2015). The USDA Pea Core Collection contains accessions from different parts of the world and  
110 represents the entire collection's morphological, geographic, and taxonomic diversity. These  
111 accessions were initially acquired from 64 different countries and are conserved at the Western  
112 Regional Plant Introduction Station, USDA, Agricultural Research Service (ARS), Pullman, WA  
113 (Cheng et al., 2015).

### 114 **DNA extraction, sequencing, SNP calling**

115 Green leaves were collected from seedlings of each accession grown in the greenhouse with the  
116 DNeasy 96 Plant Kit (Qiagen, Valencia, CA, USA). Genomic libraries for the Single Plant Plus  
117 Collection were prepped at the University of Minnesota Genomics Center (UMGC) using  
118 genotyping-by-sequencing (GBS). Four hundred eighty-two (482) dual-indexed GBS libraries  
119 were created using restriction enzyme *ApeKI* (Elshire et al., 2011). A NovaSeq S1 1 x 100  
120 Illumina Sequencing System (Illumina Inc., San Diego, CA, USA) was then used to sequence the  
121 GBS libraries. Preprocessing was performed by the UMGc that generated the GBS sequence  
122 reads. An initial quality check was performed using FastQC  
123 (<http://www.bioinformatics.babraham.ac.uk/projects/fastqc/>). Sequencing adapter remnants were  
124 clipped from all raw reads. Reads with final length <50 bases were discarded. The high-quality  
125 reads were aligned to the reference genome of *Pisum sativum* (Pulse Crop Database  
126 <https://www.pulsedb.org/>, Kreplak et al., 2019) using the Burrow Wheelers Alignment tool  
127 (Version .7.17) (Li and Durbin, 2009) with default alignment parameters, and the alignment data  
128 was processed with SAMtools (version 1.10) (Li et al., 2009). Sequence variants, including

129 single and multiple nucleotide polymorphisms (SNPs and MNPs, respectively), were identified  
130 using FreeBayes (Version 1.3.2) (Garrison and Marth, 2012). The combined read depth of 10  
131 was used across samples for identifying an alternative allele as a variant, with the minimum base  
132 quality filters of 20. The putative SNPs from freeBayes were filtered across the entire population  
133 to maintain the SNPs for biallelic with minor allele frequency (MAF) < 5%. The putative SNP  
134 discovery resulted in biallelic sites of 380,527 SNP markers. The QUAL estimate was used for  
135 estimating the Phred-scaled probability. Sites with a QUAL value less than 20 and more than  
136 80% missing values were removed from the marker matrix. The rest of the markers were further  
137 filtered out so that heterozygosity was less than 20%. The filters were applied using VCFtools  
138 (version 0.1.16) (Danecek et al., 2011) and in-house Perl scripts. The SNP data were uploaded in  
139 a public repository and is available at this link: <https://www.ncbi.nlm.nih.gov/sra/PRJNA730349>  
140 (Submission ID: SUB9608236). Missing data were imputed using a *k*-nearest neighbor genotype  
141 imputation method (Money et al., 2015) implemented in TASSEL (Bradbury et al., 2007). SNP  
142 data were converted to a numeric format where 1 denotes homozygous for a major allele, -1  
143 denotes homozygous for an alternate allele, and 0 refers to heterozygous loci. Finally, 30,646  
144 clean, curated SNP markers were identified and used for downstream analyses.

## 145 **Phenotyping**

146 Pea germplasm collections (Pea PSP) were planted following augmented design with standard  
147 checks ('Hampton,' 'Arargorn,' 'Columbian,' and '1022') at the USDA Central Ferry Farm in  
148 2016, 2017, and 2018 (planting dates were March 14, March 28, and April 03, respectively).  
149 The central Ferry farm is located at Central Ferry, WA at 46°39'5.1''N; 117°45'45.4'' W, and  
150 elevation of 198 m. The Central Ferry farm has a Chard silt loam soil (coarse-loamy, mixed,  
151 superactive, mesic Calcic Haploxerolls) and was irrigated with subsurface drip irrigation at 10  
152 min d<sup>-1</sup>. All seeds were treated with fungicides; mefenoxam (13.3 mL a.i. 45 kg<sup>-1</sup>), fludioxonil  
153 (2.4 mL a.i. 45 kg<sup>-1</sup>), and thiabendazole (82.9 mL a.i.45 kg<sup>-1</sup>), insecticide; thiamethoxam (14.3  
154 mL a.i. 45 kg<sup>-1</sup>), and sodium molybdate (16 g 45 kg<sup>-1</sup>) prior to planting. Thirty seeds were  
155 planted per plot; each plot was 152 cm long, having double rows with 30 cm center spacing. The  
156 dimensions of each plot were 152 cm x 60 cm. Standard fertilization and cultural practices were  
157 used.

158 The following traits were recorded and are presented in this manuscript. Days to first flowering  
159 (DFF) are the number of days from planting to when 10% of the plot's plants start flowering. The  
160 number of seeds per pod (NoSeedsPod) is the number of seeds in each pod. Plant height (PH cm)  
161 is defined as when all plants in a plot obtained full maturity and were measured in centimeters  
162 from the collar region at soil level to the plants' top. Pods per plant (PodsPlant) is the number of  
163 recorded pods per plant. Days to maturity (DM) referred to physiological maturity when plots  
164 were hand-harvested, mechanically threshed, cleaned with a blower, and weighed. Plot weight  
165 (PlotWeight, gm) is the weight of each plot in grams after each harvest. Seed yield (kg ha<sup>-1</sup>) is  
166 the plot weight converted to seed yield in kg per hectare.

## 167 **Phenotypic data analysis**

168 A mixed linear model was used to extract best linear unbiased predictors (BLUPs) for all traits  
169 evaluated using the following model:

170 
$$y_{ij} = \mu + G_i + E_j + (G * E)_{ij} + e_{ij} \quad (1)$$

171 where  $y_{ij}$  is the observed phenotype of  $i^{\text{th}}$  genotypes and  $j^{\text{th}}$  environment which is the number of  
172 years,  $\mu$  is the overall mean,  $G_i$  is the random genetic effect ( $i$  is number of genotypes),  $E_j$  is the  
173 random environments ( $j$  is number of years),  $(G * E)_{ij}$  is the genotype by environment  
174 interaction, and  $e_{ij}$  is the residual error.

175 For the purpose of estimating heritability, we fit the same model above. The heritability in broad  
176 sense ( $H^2$ ) on an entry-mean basis for each assessed trait was calculated to evaluate the quality of  
177 trait measurements following the equation (Hallauer et al., 2010):

178 
$$H^2 = \frac{\sigma_G^2}{\sigma_G^2 + \sigma_{GE}^2/j + \sigma_e^2/jr} \quad (2)$$

179 where  $\sigma_G^2$  is the genetic variance,  $\sigma_{GE}^2$  is variance due to the genotype by year interaction,  $\sigma_e^2$  is  
180 the error variance,  $j$  is number of years considered as environments, and  $r$  is the relative number  
181 of occurrences of each genotype in a trial (this is non-replicated trial so harmonic mean of the  
182 replicates were used as replicates). We also calculated heritability proposed by (Cullis et al.,  
183 2006) implemented in Sommer package in R (Covarrubias-Pazaran, 2016).

184 
$$H^2\text{Cullis} = 1 - \left( \frac{\text{PEV}}{\text{md} * \text{Vg}} \right) \quad (3)$$

185 where PEV is the predicted error variance for the genotype,  $V_g$  refers to the genotypic variance,  
186 md is the mean values from the diagonal of the relationship matrix, which is an identity matrix.

187 The R package, lme4 (Bates et al., 2015), was used to analyze the data. The trait values derived  
188 from the BLUPs were used to measure correlation with the ggcorrplot using ggplot2 package  
189 (Wickham 2016). All phenotypic and genomic prediction models were analyzed in the R  
190 environment (R Core Team, 2020).

## 191 **Genomic selection models**

192 The genomic selection models were fitted as follows:

193 
$$y = \mu + Zu + \varepsilon \quad (4)$$

194 where  $y$  is a vector of the genotype BLUPs obtained from equation (1),  $\mu$  is the intercept of the  
195 model used for the study,  $Z$  is the SNP marker matrix,  $u$  is the vector of marker effects, and  $\varepsilon$  is a  
196 residual vector.

197 Five genomic selection methods were used to predict genomic estimated breeding values in  
198 respective phenotypes of the assessed traits: ridge regression best linear unbiased prediction  
199 approach (RR-BLUP), partial least squares regression model (PLSR), random forest (RF),  
200 BayesCpi, and Reproducing Kernel Hilbert Space (RKHS).

201 The RR-BLUP approach assumes all markers have an equal contribution to the genetic variance.  
202 One of the most widely used methods for predicting breeding values is RR-BLUP, comparable to  
203 the best linear unbiased predictor (BLUP) used to predict the worth of entries in the context of  
204 mixed models (Meuwissen et al., 2001). The RR-BLUP basic frame model is:

205 
$$y = Zu + \varepsilon \quad (5)$$

206 where  $u \sim N(0, I\sigma_u^2)$  is a vector of marker effects and  $Z$  is the genotype matrix e.g., {aa,Aa,AA}  
207 = {0, 1, 2} for biallelic single nucleotide polymorphisms (SNPs) that relates to phenotype  $y$   
208 (Endelman, 2011). The RR-BLUP genomic prediction was implemented using the ‘RR-BLUP’  
209 package (Endelman, 2011).

210 Partial least square regression (PLSR) is a reduction dimension technique that aims to find  
211 independent latent components that maximize the covariance between the observed phenotypes  
212 and the markers (predictor variables) (Colombani et al., 2012). The number of components (also  
213 known as latent variables) should be less than the number of observations to avoid  
214 multicollinearity issues and commonly the number of components are chosen by cross  
215 validation. PLSR was executed using the ‘pls’ package (Mevik and Wehrens, 2007).

216  
217 Random forest is a machine learning model for genomic prediction that uses an average of  
218 multiple decision trees to determine the predicted values. This regression model was  
219 implemented using the ‘randomForest’ package (Breiman, 2001). The number of latent  
220 components for PLSR and decision trees for random forest was determined by a five-fold cross-  
221 validation to have a minimum prediction error.

222  
223 BayesCpi was used to verify the influence of distinct genetic architectures of different traits on  
224 prediction accuracy. The BayesCpi assumes that each marker has a probability  $\pi$  of being  
225 included in the model, and this parameter is estimated at each Markov Chain Monte Carlo  
226 (MCMC) iteration. The vector of marker effects  $u$  is assumed to be a mixture of distributions  
227 having the probability  $\pi$  of being null effect and  $(1 - \pi)$  of being a realization of a normal  
228 distribution, so that,  $u_j | \pi, \sigma_g^2 \sim N(\mathbf{0}, \sigma_g^2)$ . The vector of residual effects was considered as  
229  $e \sim N(\mathbf{0}, \sigma_e^2)$ . The marker and residual variances were assumed to follow a chi-square distribution  
230  $\sigma_g^2 \sim \chi^2(S_b, \nu_0)$  and  $\sigma_e^2 \sim \chi^2(S_b, \nu_0)$ , respectively, with  $\nu_0 = 5$  degrees of freedom as prior and  $S_b$   
231 shape parameters assuming a heritability of 0.5 (Pérez and de los Campos 2014).

232 The last model used was the Reproducing Kernel Hilbert Space (RKHS). The method is a  
233 regression where the estimated parameters are a linear function of the basis provided by the  
234 reproducing kernel (RK). RKHS considers both additive and non-additive genetic effects (de los  
235 Campos et al. 2013). In this work, the multi-kernel approach was used by averaging three kernels  
236 with distinct bandwidth values. In this implementation the averaged kernel,  $\bar{K}$  was given by:  
237  $\bar{K} = \sum_r K_r \sigma_{\beta_r}^2 \tilde{\sigma}_{\beta}^{-2}$ , where  $\tilde{\sigma}_{\beta}^2 = \sum_r \sigma_{\beta_r}^2$ . Here  $r=3$  and  $\sigma_{\beta_r}^2$  are interpretable as variance  
238 parameters associated with each kernel. Therefore, for each  $r^{\text{th}}$  kernel the proportion of sharing  
239 alleles between pairs of individuals ( $ii'$ ) was given by  $K_r = \exp\{-h_k d_{ii'}^2\}$ , where  $h_k$  is a  
240 bandwidth parameter associated with  $r^{\text{th}}$  reproducing kernel and  $d_{ii'}^2$  is the genetic distance  
241 between individuals  $i$  and  $i'$  computed as follows:  $d_{ii'}^2 = \sum_{j=1}^p (x_{ij} - x_{i'j})^2$ , where  $j=1, \dots, p$   
242 markers stated as above. The bandwidth parameter values for the three kernels were  
243  $h=0.5\{1/5, 1, 5\}$ , as suggested by Pérez and de los Campos 2014. Those values were chosen using  
244 the rule proposed by de los Campos et al. (2010).

245

246 Genomic selection methods RR-BLUP, PLSR, RF were carried out using ‘GSwGBS’ package  
247 (Gaynor, 2015) while the BayesianCpi and RKHS were executed with the BGLR package (de los  
248 Campos et al., 2010). We calculated each genomic selection model's predictive ability as the  
249 Pearson correlation between the estimated breeding values from model (1) (obtained using the  
250 full data set) and those of validation set predicted from the respective model. For that, we used a  
251 cross-validation scheme considering 80% of the observations, randomly selected, as training and  
252 the remaining 20% as validation set. The process was repeated 20 times for each model. From  
253 the predictive ability values, we estimated the confidence interval for this parameter using the  
254 bootstrap considering 10000 samples (James et al., 2013).

255

### 256 **Determining optimal training population size**

257 The influence of training population size on predictive ability was evaluated using a validation  
258 set comprising 50 randomly selected lines and training sets of variable sizes. The validation set  
259 was formed by randomly sampling 50 lines without replacement. The training population of size  
260  $n$  was formed sequentially by adding 25 accessions from the remaining accessions such that its  
261 size ranged between 50 to 175. We subset the collection into subgroups of 50, 75, 100, 125, 150,  
262 and 175 individuals each. The RR-BLUP model was used to predict each trait. This procedure  
263 was repeated 20 times, and accuracies of each training population size were averaged across 20  
264 replicates. To predict a particular subpopulation with increasing population size, a similar  
265 procedure was followed to using variable training population size ranged from 50 to 175 with an  
266 increment of 25.

### 267 **Determining optimal marker density**

268 To evaluate the effects of GBS marker selection on predictive ability, we randomly sampled  
269 markers five times with the following subset: one thousand (1 K), five thousand (5 K), ten  
270 thousand (10 K), fifteen thousand (15 K), twenty thousand (20 K), twenty-five thousand (25 K),  
271 and thirty thousand (30 K). A random sampling of SNP was implemented to minimize or avoid  
272 any possible biases on sampling towards a particular distribution. Using the RR-BLUP model, a  
273 five-fold cross validation approach was used to obtain predictive ability in each marker subset.  
274 This procedure was repeated 20 times and predictive ability for each subset of SNP were  
275 averaged across 20 replicates.

### 276 **Accounting for population structure into the genomic prediction framework**

277 We explored the confounding effect due to population structure on predictive ability. We  
278 investigated subpopulation structure on 482 accessions genotyped with 30,600 SNP markers  
279 using the ADMIXTURE clustering-based algorithm (Alexander et al., 2009). ADMIXTURE  
280 identifies  $K$  genetic clusters, where  $K$  is specified by the user, from the provided SNP data. For  
281 each individual, the ADMIXTURE method estimates the probability of membership to each  
282 cluster. An analysis was performed in multiple runs by inputting successive values of  $K$  from 2  
283 to 10. The optimal  $K$  value was determined using ADMIXTURE's cross-validation (CV) error  
284 values. Based on >60% ancestry, each accession was classified into seven subpopulations ( $K=7$ ).  
285 Accessions within a subpopulation with membership coefficients of <60% were considered  
286 admixed. A total of 8 subpopulations were used in this study, including admixed as a separate  
287 subpopulation. Principal component (PC) analysis was also conducted to summarize the genetic  
288 structure and variation present in the collection.

289 To account for the effect of population structure, we included the top 10 PCs or, the Q-matrix  
290 from ADMIXTURE into the RR-BLUP model and performed five-fold cross-validation repeated  
291 20 times. Alternatively, we also used the subpopulation (SP) designation identified by  
292 ADMIXTURE as a factor in the RR-BLUP model. Albeit a smaller population size, we also  
293 performed a within-subpopulation prediction. As stated above, a subpopulation was defined  
294 based on >60% ancestry cut-off. Only three subpopulations with this cut-off were identified and  
295 used: SP5 (N=51), SP7 (N=58), and SP8 (N=41). A leave-one-SP-out was used to predict  
296 individuals within the subpopulation with the RR-BLUP model. We also used increasing  
297 population sizes to predict specific subpopulation (e.g. SP8) using RR-BLUP model.

298

### 299 **Estimating reliability criteria and predicting unknown phenotypes:**

300 Nonphenotyped entries were predicted based on the RR-BLUP model using SNP markers only.  
301 The reliability criteria for each of the nonphenotyped lines were then calculated using the  
302 formula (Hayes et al., 2009; Clark et al., 2012) as follows:

$$303 \quad r(\text{PEV}) = \sqrt{(1 - (\text{PEV}/\sigma_G^2))} \quad (6)$$

304 where PEV is the predicted error variance, and  $\sigma_G^2$  is the genetic variance.

305

## 306 **Results**

### 307 **Phenotypic heritability and correlation**

308 Recorded DFF had a wide range of variability from 60 to 84 days with a mean of 71 days. The  
309 estimated heritability for DFF was 0.90 using equation (2) and 0.80 as per Cullis heritability  
310 using equation (3) (**Table 1**). For the number of seeds per pod, the mean was 5.7 with a  
311 heritability estimate of 0.84 ( $H^2_{\text{Cullis}}=0.66$ ). The heritability for plant height was 0.81  
312 ( $H^2_{\text{Cullis}}=0.68$ ), with an average height of 74 cm. Pods per plant had a heritability estimate of 0.50  
313 ( $H^2_{\text{Cullis}}=0.27$ ) with a mean of 18 pods per plant and ranged from 15 to 23 pods per plant. DM  
314 had a mean of 104 days with an estimated heritability of 0.51 ( $H^2_{\text{Cullis}}=0.38$ ). Seed yield per  
315 hectare ranged widely from 1734 to 4463 kg ha<sup>-1</sup> with a mean yield of 2918 kg ha<sup>-1</sup> and a  
316 heritability value of 0.67 ( $H^2_{\text{Cullis}}=0.46$ ). The number of pods per plant was highly and positively  
317 correlated with seed yield. Correlation estimation also suggested seed yield was positively  
318 correlated with plant height (PH), days to maturity (DM), days to first flowering (DFF)  
319 (**Supplementary Figure S1**).

320

### 321 **Predictive ability of different genomic selection models**

322 No single model consistently performed best across all traits that we evaluated (**Table 2**),  
323 however Bayesian model BayesCpi, Reproducing Kernel Hilbert Space (RKHS), and RR-BLUP,  
324 in general, tended to generate better results. Roughly the predictive abilities from different  
325 models were similar, although slight observed differences were likely due to variations on  
326 genetic architecture and the model's assumptions underlying them. For DFF, the highest  
327 predictive ability was obtained from the RR-BLUP (0.60). RR-BLUP, Random Forest (RF), and  
328 RKHS models generated the highest predictive ability for pods per plant (0.28). The number of  
329 seeds per pod (NoSeedPod) was better predicted by RR-BLUP and Bayes Cpi (0.42). For plant  
330 height (PH) highest prediction accuracies were obtained from RF and BayesCpi (0.45). BaysCpi



331 also gave the highest prediction accuracies for DM (0.47). For seed yield, RKHS had slight  
332 advantages over other models (0.42). As mentioned above, some differences between the model's  
333 accuracy were only marginal and cannot be a criterion for choosing one model (**Table 2**). For  
334 example, among the tested models, the highest difference in predictive accuracy, considering  
335 NoSeedsPod, had a magnitude of 0.02, a marginal value. The lack of significant differences  
336 among genomic prediction methods can be interpreted as either a good approximation to the  
337 optimal model by all methods or there may be a need for further research (Yu et al., 2016).  
338 Unless indicated otherwise, the rest of our results focused on findings from the RR-BLUP  
339 method.

#### 340 **Determining the optimal number of individuals**

341 Increasing the training population size led to a slight increase in the predictive ability overall for  
342 all traits. Across all traits except days to first flowering and plant height, predictive ability  
343 reached a maximum with the largest training population size of N=175 (**Figure 1**). A training  
344 population comprised of 50 individuals had the lowest predictive ability across all traits. For  
345 days to first flowering, and plant height predictive ability did steadily increase up at N= 150, and  
346 prediction ability reached the maximum for most traits at highest training population size with  
347 N=175. Regardless of population size, predictive ability was consistently higher for days to first  
348 flowering, whereas predictive ability was consistently lower for pods per plant (**Figure 1**).  
349 However, while predicting subpopulation 5 highest predictive ability was obtained for plant  
350 height (**Supplementary Figure S3**).

#### 351 **Determining the optimal marker density**

352 The different marker subsets had insignificant differences on predictive ability for all the traits  
353 evaluated in this study. In general, however, predictive abilities were higher between 5K to 15K  
354 SNPs and reached a plateau with increasing number of SNP (**Supplementary Figure S2**). For  
355 seed yield, plant height, and days to maturity, highest predictive ability were 0.38, 0.39, and 0.42  
356 respectively. The highest predictive ability for DFF was 0.61 using a SNP subset of 15K.

#### 357 **Accounting for population structure in the genomic prediction model**

358 Population structure explained some portion of the phenotypic variance, ranging from 9-19%,  
359 with the highest percentages observed for plant height (19%) and seed yield (17%). Using either  
360 ADMIXTURE or PCA to account for the effect due to population structure, we improved the  
361 predictive ability. We observed a 6% improvement for days to first flowering and 32% for seed  
362 yield compared over models that did not account for population structure.

363 We also performed within-subpopulation predictions. Presented here are the predictive abilities  
364 for subpopulations 5, 7, and 8, as they had at least 40 entries. Subpopulation 8 had the highest  
365 predictive ability for days to first flowering (0.68), plant height (0.33), days to maturity (0.43),  
366 and seed yield (0.37). The highest predictive abilities for the number of seeds per pod (0.40) and  
367 pods per plant (0.12) were obtained from subpopulation 7 (**Table 3**). Notably, predictive ability  
368 was generally higher when all germplasm sets or subpopulations were included in the model  
369 compared to when predictions were made using a subset of germplasm.

#### 370 **Predicting genotyped but nonphenotyped accessions**

371 The genomic prediction model was then used to predict nonphenotyped entries based on their  
372 SNP information. Based on the distribution of GEBV, none of the predicted phenotypes for  
373 nonphenotyped accessions exceeded the top-performing observed phenotypes for seed yield  
374 (**Figure 2**). The mean seed yield of predicted entries was 2914 kg/ha, and the mean of observed  
375 genotypes 2918 kg/ha were non-significant. The mean of observed and predicted entries were  
376 non-significant for the other five traits (Supplementary Table 1). The GEBV for number of pods  
377 per plant, number of seeds per pod (**Supplementary Figure S4 and S5**), days to first flowering,  
378 and days to maturity all fall within the range of observed phenotypes (Similar Figures not  
379 added).

380

### 381 **Reliability estimation**

382 We obtained reliability criteria for all traits, including seed yield and phenology, for 244  
383 nonphenotyped accessions. The average reliability values ranged from 0.30 to 0.35, while the  
384 highest values for evaluated traits ranged from 0.75 to 0.78. The higher reliability values were  
385 distributed in the top, bottom, and intermediate predicted breeding values (**Supplementary**  
386 **Table S2 to S7**). For seed yield (kg ha<sup>-1</sup>), the highest reliability was obtained from the bottom 50  
387 (**Figure 3**). Higher reliability criteria are primarily distributed among the intermediate and top  
388 GEBV for days to first flowering. Predicted intermediate plant height showed the highest  
389 reliability, as presented in **Figure 3**.

390

## 390 **Discussion**

391 Widely utilized plant genetic resources collections, such as the USDA pea germplasm collection,  
392 hold immense potential as diverse genetic resources to help guard against genetic erosion and  
393 serve as unique sources of genetic diversity from which we could enhance genetic gain, boost  
394 crop production, and help reduce crop losses due to disease, pests, and abiotic stresses (Crossa et  
395 al., 2017; Holdsworth et al., 2017; Jarquin et al., 2016; Mascher et al., 2019). As the costs  
396 associated with genotyping on a broader and more accurate scale continue to decrease,  
397 opportunities increase to utilize these collections in plant breeding. Relying on phenotypic  
398 evaluation alone can be costly, rigorous, and time-intensive. However, by incorporating high-  
399 density marker coverage and efficient computational algorithms, we can better realize the  
400 potential for utilizing these germplasm stocks by reducing the time and cost associated with their  
401 evaluation (Yu et al., 2016; H. Li et al., 2018; Yu et al., 2020). In this study, we evaluated the  
402 potential of genotyping-by-sequencing derived SNP for genomic prediction. We found that it  
403 holds promises for extracting useful diversity from germplasm collections for applied breeding  
404 efforts.

405 In this study, predictive ability was generally similar among methods, and there was no single  
406 model that worked across traits, consistent with results obtained by other authors (Burstin et al.,  
407 2015; Spindel et al., 2015; Yu et al., 2016; Azodi et al., 2019). For example, considering only the  
408 punctual estimates, RR-BLUP model was the best for DFF, however for PH, DM, and seed yield,  
409 the best models were BayesCpi and RF, BayesCpi and RKHS, respectively. In recent work,  
410 Azodi et al., (2019) compared 12 models (6 linear and 6 non-linear) considering 3 traits in 6  
411 different plant species, and they did not find any best algorithm for all traits across all species.  
412 Newer statistical methods are expected to boost prediction accuracy; however, the biological  
413 complexity and unique genetic architecture of traits can be regarded as the root cause for getting  
414 zero or slight improvement on prediction accuracy (Yu et al., 2020; Valluru et al., 2019). As data

415 collection accelerates in at different levels of biological organization (Kremling et al., 2019),  
416 genomic prediction models will expand and nonparametric models, including machine learning,  
417 may play an essential role for boosting prediction accuracy (Azodi et al., 2019; Yu et al., 2020).

418  
419 A related work in pea has been published but only based on a limited number of markers  
420 (Burstin et al., 2015). This work assessed genomic prediction models in a diverse collection of  
421 373 pea accessions with 331SNPs markers and found no single best model across traits, which is  
422 consistent with our findings. In this work, the authors reported that traits with higher heritability,  
423 such as thousand seed weight and flowering date, had higher prediction accuracy. We also  
424 verified DFF as having the highest heritability and predictive accuracies through all the models.  
425 Interestingly, yield components like the number of seeds per pod and pods per plant showed  
426 lower predictive accuracy, regardless of prediction models used. Consistent with our results,  
427 Burstin et al. (2015) also found yield components (seed number per plant) as having lower  
428 predictive accuracy and higher standard deviation for prediction. These traits are highly complex  
429 and largely influenced by the environment.

430 The predictive ability increased for all traits except plant height when we increased the model's  
431 training population size, suggesting that adding more entries in the study can boost predictive  
432 ability. By accounting population structure into genomic prediction framework, we observed an  
433 improved prediction accuracy for some traits – seed yield and DFF – but not others. Although  
434 the population structure explained 9-19% of the phenotypic variance, we cannot fully and  
435 conclusively answer the effect of population structure in prediction accuracy due to smaller  
436 population size. In addition, accounting for the relatedness among individuals in the training and  
437 testing sets can potentially boost prediction accuracy (Lorenz and Smith, 2015; Rutkoshi et al.,  
438 2015; Riedelsheimer et al., 2013); it was outside the scope of this research but deserves further  
439 study. Adding more environments (year-by-location combination) can also potentially improve  
440 prediction accuracy using genomic prediction frameworks that account for genotype-by-  
441 environment interactions and/or phenotypic plasticity (Jarquin et al, 2014; Crossa et al., 2017; X.  
442 Li et al., 2018; Guo et al., 2020). In general, we observed that predictive ability slightly increased  
443 and plateaued after reaching certain subset of SNPs. Such a plateau on prediction ability maybe  
444 due to overfitting of models (Norman et al., 2018; Hickey et al., 2014), presumably due to  
445 extensive linkage disequilibrium in the pea genome (Kreplak et al., 2019).

446 Previous studies have indicated the importance of considering reliability values when using  
447 predictive ability values to select genotypes (Yu et al., 2016). We found higher reliability  
448 estimates were spread across all GEBVs rather than clustering around higher or lower extreme of  
449 GEBVs. Those accessions with top predicted values and high-reliability estimates maybe  
450 selected as candidate parents for increasing seed yield and/or germplasm enhancement.  
451 However, for a trait such as days to flowering in pea, even low or intermediate predicted values  
452 maybe suitable candidates when paired with high-reliability values. We found the means of  
453 GEBV for nonphenotyped entries were non-significantly different with phenotyped accessions,  
454 and almost none of nonphenotyped accessions were expected to exceed seed yield of phenotyped  
455 accessions. Several accessions in the USDA pea germplasm collection can be readily  
456 incorporated into breeding programs for germplasm enhancement by incorporating above-  
457 average accessions with high or moderately high-reliability values (Yu et al., 2020).

458

459

## Conclusions and Research Directions

460 The research findings demonstrated that the wealth of genetic diversity available in a germplasm  
461 collection could be assessed efficiently and quickly using genomic prediction to identify valuable  
462 germplasm accessions that can be used for applied breeding efforts. With the integration of more  
463 orthogonal information (e.g., expression, metabolomics, proteomics, etc.) into genomic  
464 prediction framework (Kremling et al., 2019; Valluru et al., 2019) coupled with the  
465 implementation of more complex genomic selection models like a multivariate genomic  
466 selection approach (Rutkoski et al., 2015), we can considerably enhance predictive ability. This  
467 research framework could greatly contribute to help discover and extract useful diversity  
468 targeting high-value quality traits such as protein and mineral concentrations from a large  
469 germplasm collection in the future.

## 470 Conflict of Interest

471 The authors declare no conflict of interest.

## 472 Author Contributions

473 NBB, CJC, and MAB conceived and designed the manuscript. CJC, DM, and RMcG designed  
474 and executed the field and genotyping experiments. YM and PZ performed DNA extraction,  
475 constructed the library, and called SNPs. MAB, IV, and SS analyzed data, curated SNPs, and ran  
476 genomic selection models. NBB oversaw statistical analyses. MAB, HW, IV, and NBB wrote  
477 and edited the overall manuscript. All authors edited, reviewed, and approved the manuscript.

## 478 Acknowledgments

479 The authors would like to acknowledge the funding provided by USDA Plant Genetic Resource  
480 Evaluation Grant for the GS analysis, USA Dry Pea and Lentil Council Research Committee for  
481 the field phenotyping, and USDA ARS Pulse Crop Health Initiative for the SNP genotyping and  
482 support from USDA ARS Project: 5348-21000-017-00D (CJC), and 5348-21000-024-00D  
483 (RJM). We also acknowledge the support from USDA-NIFA (Hatch Project ND01513 for NBB)  
484 and the North Dakota Department of Agriculture through the Specialty Crop Block Grant  
485 Program (19-429). Technical assistance from Britton Bourland, Lydia Fields, Kurt Tetrick, and  
486 Jennifer Morris gratefully acknowledged. This work used resources of the Center for  
487 Computationally Assisted Science and Technology (CCAST) at North Dakota State University,  
488 Fargo, ND, USA which were made possible in part by NSF MRI Award No. 2019077.

489

## References

- 490 Alexander, D.H., Novembre, J. and Lange, K., 2009. Fast model-based estimation of ancestry in  
491 unrelated individuals. *Genome Research*, 19(9), pp.1655-1664.
- 492 Annicchiarico, P., Nelson N., Meriem L., Imane Thami-Alami, Massimo R., and Luciano P.  
493 2020. "Development and Proof-of-Concept Application of Genome-Enabled Selection for  
494 Pea Grain Yield under Severe Terminal Drought." *International Journal of Molecular*  
495 *Sciences* 21 (7): 1–20. <https://doi.org/10.3390/ijms21072414>.
- 496 Annicchiarico, P., Nelson N., Luciano P., Massimo R., and Luigi R. 2019. "Pea Genomic  
497 Selection for Italian Environments." *BMC Genomics* 20 (1): 1–18.  
498 <https://doi.org/10.1186/s12864-019-5920-x>.

- 499 Azodi, Christina B., Emily B., Andrew M., Mark R., Gustavo de los Campos, and Shin H. S.  
500 2019. “Benchmarking Parametric and Machine Learning Models for Genomic Prediction of  
501 Complex Traits.” *G3: Genes, Genomes, Genetics* 9 (11): 3691–3702.  
502 <https://doi.org/10.1534/g3.119.400498>.
- 503 Bates, D., Martin M., Benjamin M. B., and Steven C. W. 2015. “Fitting Linear Mixed-Effects  
504 Models Using Lme4.” *Journal of Statistical Software* 67 (1).  
505 <https://doi.org/10.18637/jss.v067.i01>.
- 506 Bethke, Paul C., Dennis A. H., and Shelley H. J. 2019. “Potato Germplasm Enhancement Enters  
507 the Genomics Era,” 1–20.
- 508 Bradbury, P. J., Zhiwu Z., Dallas E. K., Terry M. C., Yogesh R., and Edward S. B. 2007.  
509 “TASSEL: Software for Association Mapping of Complex Traits in Diverse Samples.”  
510 *Bioinformatics* 23 (19): 2633–35. <https://doi.org/10.1093/bioinformatics/btm308>.
- 511 Breiman, L., 2001 Random Forests. *Mach. Learn.* 45: 5–32. [https://doi.org/](https://doi.org/10.1023/A:1010933404324)  
512 [10.1023/A:1010933404324](https://doi.org/10.1023/A:1010933404324)
- 513 Burstin, Judith, Pauline Salloignon, Marianne Chabert-Martinello, Jean Bernard Magnin-Robert,  
514 Mathieu Siol, Françoise Jacquin, Aurélie Chauveau, et al. 2015. “Genetic Diversity and  
515 Trait Genomic Prediction in a Pea Diversity Panel.” *BMC Genomics* 16 (1): 1–17.  
516 <https://doi.org/10.1186/s12864-015-1266-1>.
- 517 Cheng, Peng, William Holdsworth, Yu Ma, Clarice J. Coyne, Michael Mazourek, Michael A.  
518 Grusak, Sam Fuchs, and Rebecca J. McGee. 2015. “Association Mapping of Agronomic  
519 and Quality Traits in USDA Pea Single-Plant Collection.” *Molecular Breeding* 35 (2).  
520 <https://doi.org/10.1007/s11032-015-0277-6>.
- 521 Clark, Samuel A., John M. Hickey, Hans D. Daetwyler, and Julius H.J. van der Werf. 2012. “The  
522 Importance of Information on Relatives for the Prediction of Genomic Breeding Values and  
523 the Implications for the Makeup of Reference Data Sets in Livestock Breeding Schemes.”  
524 *Genetics, Selection, Evolution : GSE* 44 (1): 4. <https://doi.org/10.1186/1297-9686-44-4>.
- 525 Colombani, C., P. Croiseau, S. Fritz, F. Guillaume, A. Legarra, V. Ducrocq, and C. Robert-  
526 Granié. 2012. “A Comparison of Partial Least Squares (PLS) and Sparse PLS Regressions  
527 in Genomic Selection in French Dairy Cattle.” *Journal of Dairy Science* 95 (4): 2120–31.  
528 <https://doi.org/10.3168/jds.2011-4647>.
- 529 Covarrubias-Pazarán, Giovanni. 2016. “Genome-Assisted Prediction of Quantitative Traits  
530 Using the r Package sommer.” *PLoS ONE* 11 (6): 1–15.  
531 <https://doi.org/10.1371/journal.pone.0156744>.
- 532 Coyne, C J, A F Brown, G M Timmerman-Vaughan, K E McPhee, and M A Grusak. 2005.  
533 “USDA-ARS Refined Pea Core Collection for 26 Quantitative Traits.” *Pisum Genetics* 37  
534 (11): 1–4.
- 535 Cullis, Brian R., A. B. Smith, and N. E. Coombes. 2006. “On the Design of Early Generation  
536 Variety Trials with Correlated Data.” *Journal of Agricultural, Biological, and*  
537 *Environmental Statistics* 11 (4): 381–93. <https://doi.org/10.1198/108571106X154443>.
- 538 Crossa, José, Diego Jarquín, Jorge Franco, Paulino Pérez-Rodríguez, Juan Burgueño, Carolina  
539 Saint-Pierre, Prashant Vikram, et al. 2016. “Genomic Prediction of Gene Bank Wheat  
540 Landraces.” *G3: Genes, Genomes, Genetics* 6 (7): 1819–34.  
541 <https://doi.org/10.1534/g3.116.029637>.
- 542 Crossa, José, Paulino Pérez-rodríguez, Jaime Cuevas, Osva Montesinos-lópez, Diego Jarquín,  
543 Gustavo De Los Campos, Juan Burgueño, et al. 2017. “Genomic Selection in Plant  
544 Breeding : Methods , Models , and Perspectives.” *Trends in Plant Science* xx: 1–15.

- 545 <https://doi.org/10.1016/j.tplants.2017.08.011>.
- 546 Danecek, P., Auton, A., Abecasis, G., Albers, C. A., Banks, E., DePristo, M. A., ... Durbin, R.  
547 2011. The variant call format and VCFtools. *Bioinformatics*, 27(15), 2156–2158.  
548 <https://doi.org/10.1093/bioinformatics/btr330>.
- 549 de los Campos, G., Hickey, J., Pong-Wong, R., Daetwyler, H. and M. Calus, 2013. Whole-  
550 genome regression and prediction methods applied to plant and animal breeding. *Genetics*  
551 193: 327–345. <https://doi.org/10.1534/genetics.112.143313>.
- 552 de los Campos, Gustavo De, Daniel Gianola, Guilherme J.M. Rosa, Kent A. Weigel, and Jos  
553 Crossa. 2010. “Semi-Parametric Genomic-Enabled Prediction of Genetic Values Using  
554 Reproducing Kernel Hilbert Spaces Methods.” *Genetics Research* 92 (4): 295–308.  
555 <https://doi.org/10.1017/S0016672310000285>.
- 556 Elshire, R. J., Glaubitz, J. C., Sun, Q., Poland, J. A., Kawamoto, K., Buckler, E. S., & Mitchell,  
557 S. E. (2011). A robust, simple genotyping-by-sequencing (GBS) approach for high diversity  
558 species. *PLoS ONE*, 6(5), 1–10. <https://doi.org/10.1371/journal.pone.0019379>
- 559 Endelman, Jeffrey B. 2011. “Ridge Regression and Other Kernels for Genomic Selection with R  
560 Package RR-BLUP.” *The Plant Genome* 4 (3): 250–55.  
561 <https://doi.org/10.3835/plantgenome2011.08.0024>.
- 562 Facciolongo, Anna Maria, Giuseppe Rubino, Antonia Zarrilli, Arcangelo Vicenti, Marco Ragni,  
563 and Francesco Totoda. 2014. “Alternative Protein Sources in Lamb Feeding 1. Effects on  
564 Productive Performances, Carcass Characteristics and Energy and Protein Metabolism.”  
565 *Progress in Nutrition* 16 (2): 105–15.
- 566 Garrison, E., & Marth, G. 2012. Haplotype-based variant detection from short-read sequencing.  
567 ArXiv: 1207.3907 [q-Bio]. Retrieved from <http://arxiv.org/abs/1207.3907>.
- 568 Gaynor, R.C. 2015. GSwGBS: An R package genomic selection with genotyping-by-sequencing.  
569 Genomic selection for Kansas wheat. K-State Research Exchange, Manhattan, KS.
- 570 Gorjanc, Gregor, Janez Jenko, Sarah J Hearne, and John M Hickey. 2016. “Initiating Maize Pre-  
571 Breeding Programs Using Genomic Selection to Harness Polygenic Variation from  
572 Landrace Populations.” *BMC Genomics* 17 (1): 1–15. [https://doi.org/10.1186/s12864-015-](https://doi.org/10.1186/s12864-015-2345-z)  
573 [2345-z](https://doi.org/10.1186/s12864-015-2345-z).
- 574 Guo, Jia, Sumit Pradhan, Dipendra Shahi, Jahangir Khan, Jordan Mcbreen, Guihua Bai, J. Paul  
575 Murphy, and Md Ali Babar. 2020. “Increased Prediction Accuracy Using Combined  
576 Genomic Information and Physiological Traits in A Soft Wheat Panel Evaluated in Multi-  
577 Environments.” *Scientific Reports* 10 (1): 1–12. [https://doi.org/10.1038/s41598-020-63919-](https://doi.org/10.1038/s41598-020-63919-3)  
578 [3](https://doi.org/10.1038/s41598-020-63919-3).
- 579 Haile, Teketel A., Taryn Heidecker, Derek Wright, Sandesh Neupane, Larissa Ramsay, Albert  
580 Vandenberg, and Kirstin E. Bett. 2020. “Genomic Selection for Lentil Breeding: Empirical  
581 Evidence.” *Plant Genome* 13 (1): 1–15. <https://doi.org/10.1002/tpg2.20002>.
- 582 Habier, D, R L Fernando, and J C M Dekkers. 2007. “The Impact of Genetic Relationship  
583 Information on Genome-Assisted Breeding Values.”  
584 <https://doi.org/10.1534/genetics.107.081190>.
- 585 Hallauer, A R, M J Carena, and J B Miranda Fo. 2010. *Hand Book of Plant Breeding:*  
586 *Quantitative genetics in maize breeding*. 3rd ed. Springer, New York.
- 587 Hayes, B J, P J Bowman, A J Chamberlain, and M E Goddard. 2009. “Invited Review : Genomic  
588 Selection in Dairy Cattle : Progress and Challenges.” *Journal of Dairy Science* 92 (2): 433–  
589 43. <https://doi.org/10.3168/jds.2008-1646>.
- 590 Hickey, John M., Susanne Dreisigacker, Jose Crossa, Sarah Hearne, Raman Babu, Boddupalli M.

- 591 Prasanna, Martin Grondona, et al. 2014. “Evaluation of Genomic Selection Training  
592 Population Designs and Genotyping Strategies in Plant Breeding Programs Using  
593 Simulation.” *Crop Science* 54 (4): 1476–88. <https://doi.org/10.2135/cropsci2013.03.0195>.
- 594 Holdsworth, William L., Elodie Gazave, Peng Cheng, James R. Myers, Michael A. Gore, Clarice  
595 J. Coyne, Rebecca J. McGee, and Michael Mazourek. 2017. “A Community Resource for  
596 Exploring and Utilizing Genetic Diversity in the USDA Pea Single Plant plus Collection.”  
597 *Horticulture Research* 4 (January). <https://doi.org/10.1038/hortres.2017.17>.
- 598 James, G., Witten, D., Hastie, T., Tibshirani, R. 2013. An Introduction to Statistical Learning:  
599 with Applications in R. Springer, New York. ISBN 978-1-4614-7138-7(eBook).
- 600 Jarquin, Diego, James Specht, and Aaron Lorenz. 2016. “Prospects of Genomic Prediction in the  
601 USDA Soybean Germplasm Collection: Historical Data Creates Robust Models for  
602 Enhancing Selection of Accessions.” *G3: Genes, Genomes, Genetics* 6 (8): 2329–41.  
603 <https://doi.org/10.1534/g3.116.031443>.
- 604 Kremling KAG, Diepenbrock CH, Gore MA, Buckler ES, Bandillo NB. 2019. Transcriptome-  
605 Wide Association Supplements Genome-Wide Association in *Zea mays*. *G3*. 9:3023–3033.
- 606 Kreplak, J., Madoui, M.A., Cápál, P., Novák, P., Labadie, K., et al, 2019. A reference genome  
607 for pea provides insight into legume genome evolution. *Nature Genetics*, 51(9), pp.1411-  
608 1422.
- 609 Li H. and Durbin R. 2009. Fast and accurate short read alignment with Burrows-Wheeler  
610 Transform. *Bioinformatics*, 25:1754-60).
- 611 Li, H., Handsaker, B., Wysoker, A., Fennell, T., Ruan, J., Homer, N., Marth, G., Abecasis, G.  
612 and Durbin, R., 2009. The sequence alignment/map format and  
613 SAMtools. *Bioinformatics*, 25(16), pp.2078-2079.
- 614 Li, Huihui, Awais Rasheed, Lee T. Hickey, and Zhonghu He. 2018. “Fast-Forwarding Genetic  
615 Gain.” *Trends in Plant Science* 23 (3): 184–86.  
616 <https://doi.org/10.1016/j.tplants.2018.01.007>.
- 617 Li, Xin, Tingting Guo, Qi Mu, Xianran Li, and Jianming Yu. 2018. “Genomic and  
618 Environmental Determinants and Their Interplay Underlying Phenotypic Plasticity.”  
619 *Proceedings of the National Academy of Sciences of the United States of America* 115 (26):  
620 6679–84. <https://doi.org/10.1073/pnas.1718326115>.
- 621 Liu, Z., F. Seefried, F. Reinhardt, S. Rensing, G. Thaller et al., 2011 Impacts of both reference  
622 population size and inclusion of a residual polygenic effect on the accuracy of genomic  
623 prediction. *Genet. Sel. Evol.* 43: 19. <https://doi.org/10.1186/1297-9686-43-19>.
- 624 Longin, C. Friedrich H., and Jochen C. Reif. 2014. “Redesigning the Exploitation of Wheat  
625 Genetic Resources.” *Trends in Plant Science* 19 (10): 631–36.  
626 <https://doi.org/10.1016/j.tplants.2014.06.012>.
- 627 Lorenz, A. J. & Smith, K. P. 2015. Adding genetically distant individuals to training populations  
628 reduces genomic prediction accuracy in barley. *Crop Sci.* 55, 2657–2667.
- 629 Mascher, Martin, Mona Schreiber, Uwe Scholz, Andreas Graner, Jochen C. Reif, and Nils Stein.  
630 2019. “Genebank Genomics Bridges the Gap between the Conservation of Crop Diversity  
631 and Plant Breeding.” *Nature Genetics* 51 (7): 1076–81. <https://doi.org/10.1038/s41588-019-0443-6>.
- 632
- 633 Meuwissen, T H E, B J Hayes, and M E Goddard. 2001. “Prediction of Total Genetic Value  
634 Using Genome-Wide Dense Marker Maps.”
- 635 Mevik, B.-H., & Wehrens, R. (2007). The pls Package: Principal Component and Partial Least  
636 Squares Regression in R. *Journal of Statistical Software*, 18(2), 1–23.

- 637 <https://doi.org/10.18637/jss.v018.i02>.
- 638 Money, Daniel, Kyle Gardner, Zoë Migicovsky, Heidi Schwaninger, Gan Yuan Zhong, and Sean  
639 Myles. 2015. "LinkImpute: Fast and Accurate Genotype Imputation for Nonmodel  
640 Organisms." *G3: Genes, Genomes, Genetics* 5 (11): 2383–90.  
641 <https://doi.org/10.1534/g3.115.021667>.
- 642 Mudryj, Adriana N., Nancy Yu, and Harold M. Aukema. 2014. "Nutritional and Health Benefits  
643 of Pulses." *Applied Physiology, Nutrition and Metabolism* 39 (11): 1197–1204.  
644 <https://doi.org/10.1139/apnm-2013-0557>.
- 645 Norman, Adam, Julian Taylor, James Edwards, and Haydn Kuchel. 2018. "Optimising Genomic  
646 Selection in Wheat: Effect of Marker Density, Population Size and Population Structure on  
647 Prediction Accuracy." *G3: Genes, Genomes, Genetics* 8 (9): 2889–99.  
648 <https://doi.org/10.1534/g3.118.200311>.
- 649 Pérez, Paulino, and Gustavo De Los Campos. 2014. "Genome-Wide Regression and Prediction  
650 with the BGLR Statistical Package." *Genetics* 198 (2): 483–95.  
651 <https://doi.org/10.1534/genetics.114.164442>.
- 652 R Core Team. 2020. R: A language and environment for statistical computing. R Foundation for  
653 Statistical Computing, Vienna, Austria. <https://www.R-project.org/>.
- 654 Riedelsheimer, Christian, Yariv Brotman, Michaël Méret, Albrecht E. Melchinger, and Lothar  
655 Willmitzer. 2013. "The Maize Leaf Lipidome Shows Multilevel Genetic Control and High  
656 Predictive Value for Agronomic Traits." *Scientific Reports* 3: 1–7.  
657 <https://doi.org/10.1038/srep02479>.
- 658 Rutkoski, J., R. P. Singh, J. Huerta-Espino, S. Bhavani, J. Poland, J. L. Jannink, and M. E.  
659 Sorrells. 2015. "Efficient Use of Historical Data for Genomic Selection: A Case Study of  
660 Stem Rust Resistance in Wheat." *The Plant Genome* 8 (1): 1–10.  
661 <https://doi.org/10.3835/plantgenome2014.09.0046>.
- 662 Riedelsheimer, Christian, Yariv Brotman, Michaël Méret, Albrecht E. Melchinger, and Lothar  
663 Willmitzer. 2013. "The Maize Leaf Lipidome Shows Multilevel Genetic Control and High  
664 Predictive Value for Agronomic Traits." *Scientific Reports* 3: 1–7.  
665 <https://doi.org/10.1038/srep02479>.
- 666 Simson, C. J. & Hannan, R. M. 1995. "Development and Use of Core Subsets of Cool-Season  
667 Food Legume Germplasm Collections." *HortScience* 30: 907.
- 668 Spindel, Jennifer, Hasina Begum, Deniz Akdemir, Parminder Virk, Bertrand Collard, Edilberto  
669 Redoña, Gary Atlin, Jean Luc Jannink, and Susan R. McCouch. 2015. "Genomic Selection  
670 and Association Mapping in Rice (*Oryza sativa*): Effect of Trait Genetic Architecture,  
671 Training Population Composition, Marker Number and Statistical Model on Accuracy of  
672 Rice Genomic Selection in Elite, Tropical Rice Breeding Lines." *PLoS Genetics* 11 (2): 1–  
673 25. <https://doi.org/10.1371/journal.pgen.1004982>.
- 674 Tayeh, Nadim, Anthony Klein, Marie Christine Le Paslier, Françoise Jacquin, Hervé Houtin,  
675 Céline Rond, Marianne Chabert-Martinello, et al. 2015. "Genomic Prediction in Pea: Effect  
676 of Marker Density and Training Population Size and Composition on Prediction Accuracy."  
677 *Frontiers in Plant Science* 6 (NOVEMBER): 1–11.  
678 <https://doi.org/10.3389/fpls.2015.00941>.
- 679 USDA. 2020. "United States Acreage," 1–50.  
680 [https://www.nass.usda.gov/Publications/Todays\\_Reports/reports/acrg0620.pdf](https://www.nass.usda.gov/Publications/Todays_Reports/reports/acrg0620.pdf).
- 681 Valluru, R., Gazave, E. E., Fernandes, S. B., Ferguson, J. N., Lozano, R., Hirannaiah, P., ...  
682 Bandillo, N. 2019. Deleterious mutation burden and its association with complex traits in



683 sorghum (*Sorghum bicolor*). *Genetics*, 211(3), 1075 LP – 1087.  
 684 Vandemark, G J, M Brick, J M Osorno, D J Kelly & C A Urrea. 2014. Edible grain legumes. In  
 685 S Smith, B Diers, J. Specht, & B Carver (Eds.), *Yield Grains in major U.S. field crops*  
 686 (pp.87-123). Madison, WI: CSSA. <https://doi.org/10.3390/cli6020041>.  
 687 VanRaden, P. M. 2008. “Efficient Methods to Compute Genomic Predictions.” *Journal of Dairy*  
 688 *Science* 91 (11): 4414–23. <https://doi.org/10.3168/jds.2007-0980>.  
 689 Wickham H (2016). *ggplot2: Elegant Graphics for Data Analysis*. Springer-Verlag New York.  
 690 ISBN 978-3-319-24277-4.  
 691 Yu, Xiaoqing, Samuel Leiboff, Xianran Li, Tingting Guo, Natalie Ronning, Xiaoyu Zhang, Gary  
 692 J. Muehlbauer, et al. 2020. “Genomic Prediction of Maize Microphenotypes Provides  
 693 Insights for Optimizing Selection and Mining Diversity.” *Plant Biotechnology Journal*,  
 694 2456–65. <https://doi.org/10.1111/pbi.13420>.  
 695 Yu, Xiaoqing, Xianran Li, Tingting Guo, Chengsong Zhu, Yuye Wu, Sharon E. Mitchell, Kraig  
 696 L. Roozeboom, et al. 2016. “Genomic Prediction Contributing to a Promising Global  
 697 Strategy to Turbocharge Gene Banks.” *Nature Plants* 2 (October).  
 698 <https://doi.org/10.1038/nplants.2016.150>.

Table 1. Heritability and summary statistics for seed yield and other agronomic traits

| Trait                            | Mean | Range      | SD   | CV(%) | $H^2$ | $H^2_{\text{Cullis}}$ |
|----------------------------------|------|------------|------|-------|-------|-----------------------|
| DFF (days)                       | 71   | 60-84      | 4.8  | 6.7   | 0.90  | 0.80                  |
| NoSeedsPod (Nos.)                | 5.7  | 4.4-6.9    | 0.5  | 8.5   | 0.84  | 0.66                  |
| PH (cm)                          | 74   | 37.6-108.3 | 11.5 | 15.5  | 0.81  | 0.68                  |
| PodsPlant (Nos.)                 | 18   | 15-23      | 1.5  | 8.3   | 0.50  | 0.27                  |
| DM (days)                        | 104  | 99-112     | 2.4  | 2.3   | 0.51  | 0.38                  |
| SeedYield (Kg ha <sup>-1</sup> ) | 2918 | 1734-4463  | 451  | 15.4  | 0.67  | 0.46                  |

699 DFF is days to first flowering; NoSeedsPod is the number of seeds per pod, PH is plant height,  
 700 PodsPlant is the number of pods per plant, DM is days to physiological maturity, SeedYield is  
 701 seed yield per hectare, SD is the standard deviation, CV is coefficient of variance,  $H^2$  is  
 702 heritability in the broad sense.

703  
 704  
 705  
 706  
 707  
 708  
 709  
 710  
 711

712 Table 2. Predictive ability of genomic selection models for seed yield and agronomic traits from  
713 five genomic selection models

| <b>Traits</b>       | <b>RR-BLUP</b>      | <b>PLSR</b>         | <b>RF</b>           | <b>BayesCpi</b>     | <b>RKHS</b>         |
|---------------------|---------------------|---------------------|---------------------|---------------------|---------------------|
| DFF (days)          | 0.60<br>(0.57-0.63) | 0.57<br>(0.53-0.61) | 0.55<br>(0.52-0.58) | 0.59<br>(0.55-0.63) | 0.54<br>(0.5-0.58)  |
| NoSeedsPod          | 0.42<br>(0.37-0.48) | 0.41<br>(0.36-0.46) | 0.40<br>(0.35-0.45) | 0.42<br>(0.38-0.46) | 0.40<br>(0.34-0.48) |
| PH (cm)             | 0.39<br>(0.33-0.44) | 0.42<br>(0.38-0.48) | 0.45<br>(0.4-0.5)   | 0.45<br>(0.41-0.48) | 0.43<br>(0.39-0.48) |
| PodsPlant           | 0.28<br>(0.22-0.33) | 0.25<br>(0.2-0.31)  | 0.28<br>(0.22-0.34) | 0.23<br>(0.17-0.29) | 0.28<br>(0.23-0.34) |
| DM (days)           | 0.42<br>(0.36-0.47) | 0.44<br>(0.39-0.5)  | 0.41<br>(0.35-0.46) | 0.47<br>(0.43-0.5)  | 0.45<br>(0.4-0.48)  |
| SeedYield (kg ha-1) | 0.38<br>(0.34-0.42) | 0.31<br>(0.27-0.36) | 0.39<br>(0.35-0.44) | 0.35<br>(0.31-0.39) | 0.42<br>(0.37-0.48) |

714 DFF is days to first flowering, PH is Plant height in cm, DM is days to physiological maturity;  
715 within parentheses are ranges of predictive ability

Table 3. Predictive ability within and across subpopulations using RR-BLUP and all markers

| Sub pops          | DFF  | NoSeedsPod | PH   | PodsPlant | DM    | SeedYield |
|-------------------|------|------------|------|-----------|-------|-----------|
| Sub pop 5 (51)    | 0.27 | 0.26       | 0.08 | -0.01     | 0.02  | 0.18      |
| Sub pop 7 (58)    | 0.34 | 0.40       | 0.22 | 0.12      | -0.01 | 0.01      |
| Sub pop 8 (41)    | 0.68 | 0.35       | 0.33 | 0.07      | 0.43  | 0.37      |
| SP-               | 0.50 | 0.45       | 0.47 | 0.25      | 0.51  | 0.34      |
| SP+               | 0.53 | 0.35       | 0.42 | 0.25      | 0.48  | 0.45      |
| SP PC10           | 0.51 | 0.41       | 0.44 | 0.18      | 0.20  | 0.43      |
| Var exp ( $R^2$ ) | 0.13 | 0.09       | 0.19 | 0.15      | 0.15  | 0.17      |

716 DFF is days to first flowering, PH is plant height, DM is days to physiological maturity, SP- does  
717 not account for population structure, SP+, refers to the population structure addressed in the  
718 model, SP PC10 addresses population structure with 10 PC, Var exp ( $R^2$ ) refers the variance  
719 explained by population structure after fitting a regression model, within parenthesis represent  
720 the number of entries in each subpopulation.

721

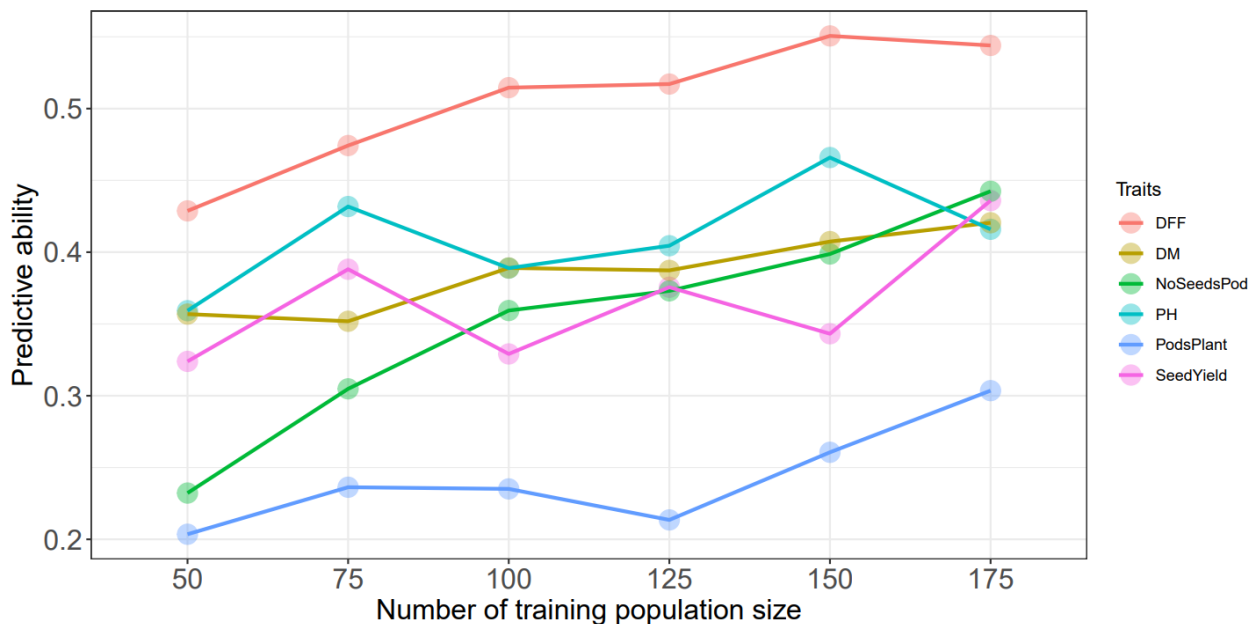

722  
723 Figure 1. Predictive ability with increasing training population size using RR-BLUP model, DFF  
724 is days to first flowering, DM, is days to physiological maturity, NoSeedsPod is number of seeds  
725 per pod, PH is plant height in cm, PodsPlant is pods per plant, SeedYield is seed yield in kg ha<sup>-1</sup>  
726

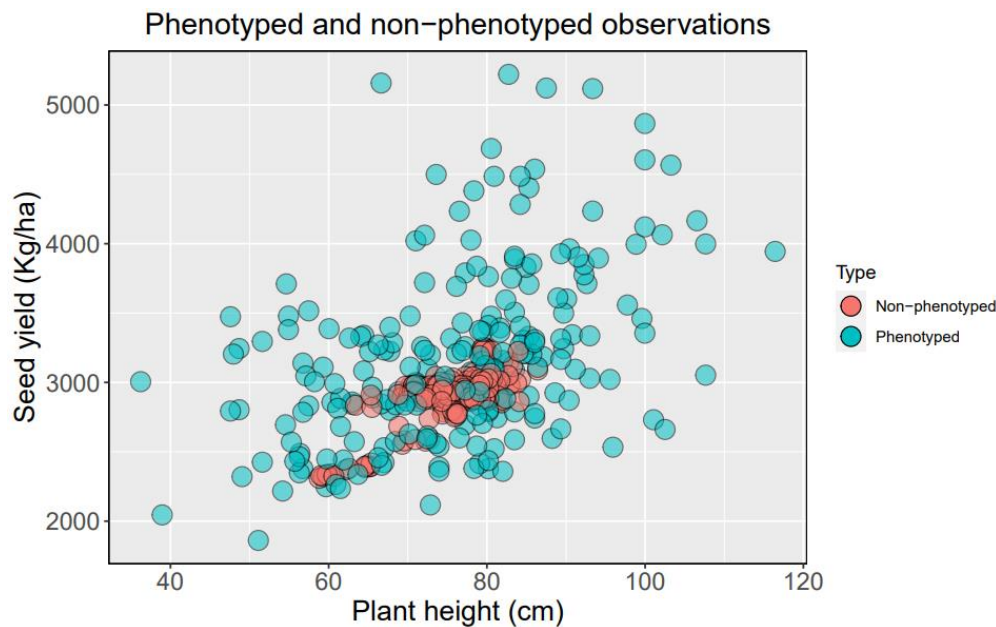

727  
728 Figure 2. Distribution phenotyped and predicted non-phenotyped accessions of USDA pea  
729 germplasm collections for seed yield and plant height

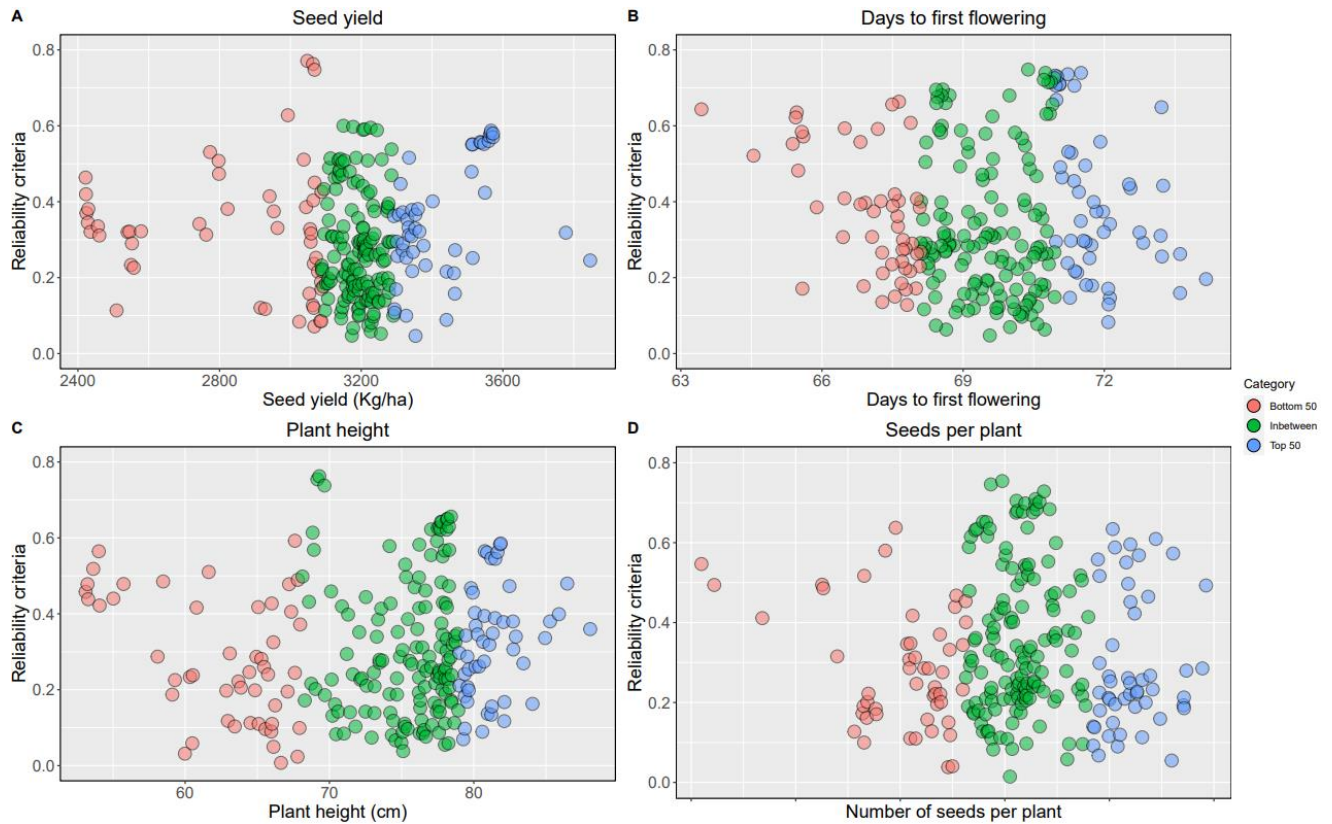

730

731 Figure 3. Reliability criteria for nonphenotyped lines: the top 50 of the genomic estimated breeding  
732 values are blue, and bottom 50 are in red, intermediates are in green. A. reliability estimates for seed  
yield (Kg/ha), B. days to first flowering, C. plant height, D. seeds per plant

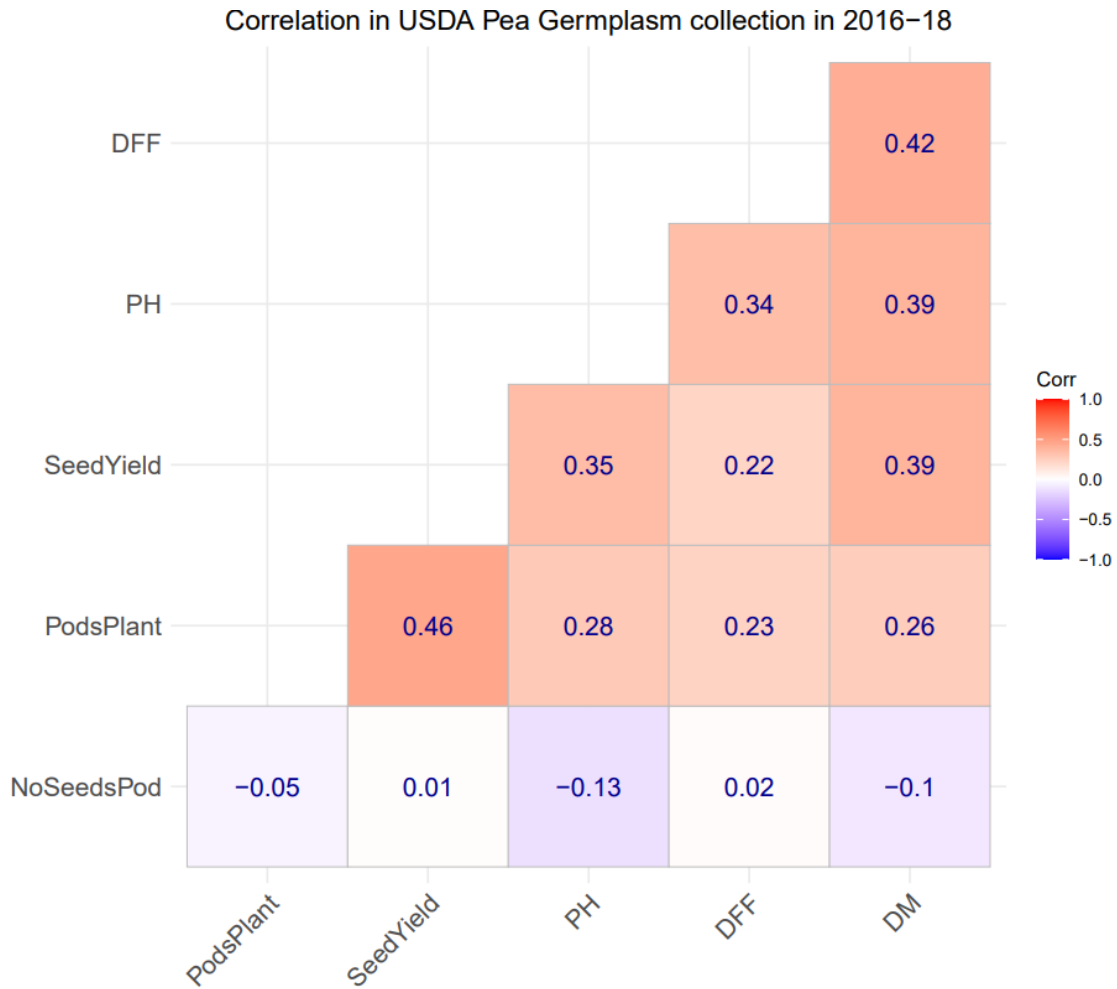

733

734 Supplementary Figure S1. Phenotypic correlation among seed yield and agronomic traits  
735 evaluated in this study, DFF is days to first flowering, PH is plant height in cm, SeedYield is  
736 seed yield in  $\text{kg ha}^{-1}$ , DM is the days to physiological maturity

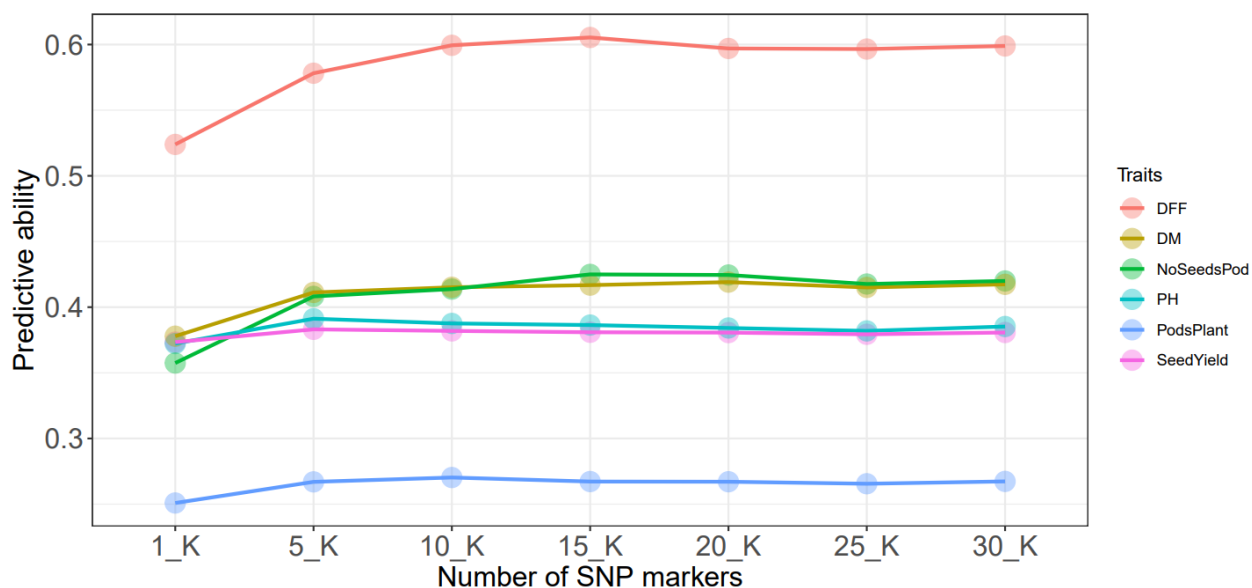

737  
738

739 Supplementary Figure S2. Predictive ability with increasing SNP markers RR-BLUP model,  
740 DFF is days to first flowering, DM, is days to physiological maturity, NoSeedsPod is number of  
741 seeds per pod, PH is plant height in cm, PodsPlant is pods per plant, SeedYield is seed yield in  
742 kg ha<sup>-1</sup>

743

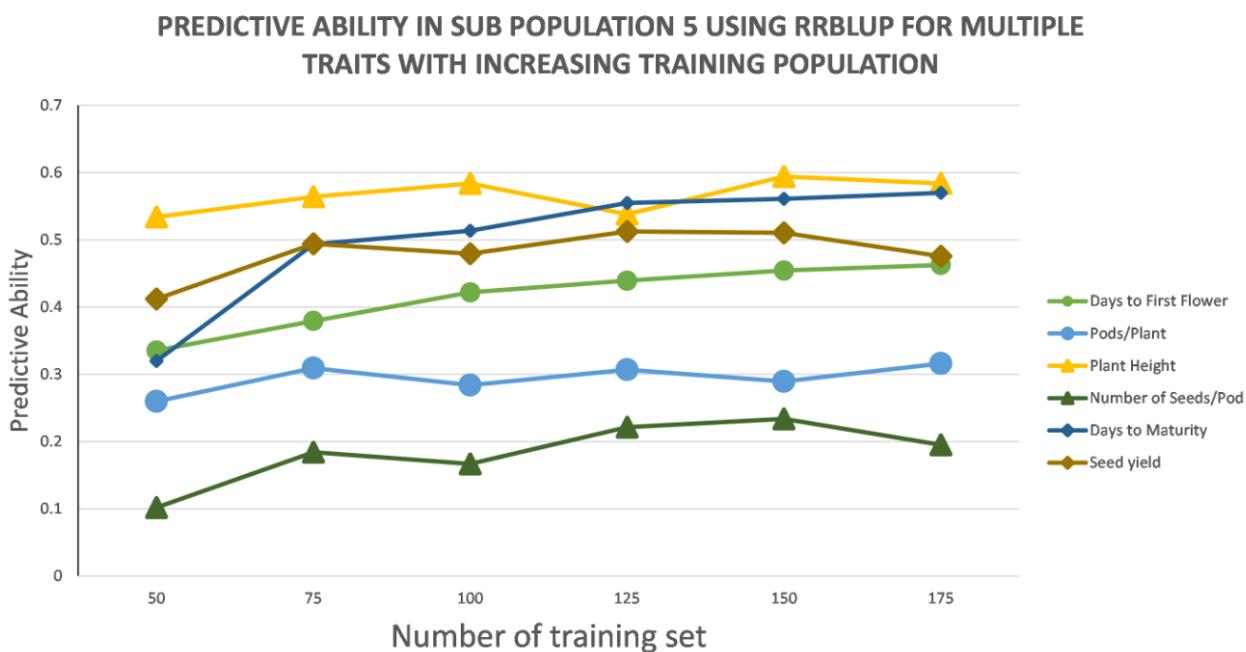

744

745 Supplementary Figure S3. Predictive ability of subpopulation 5 with increasing training  
746 population

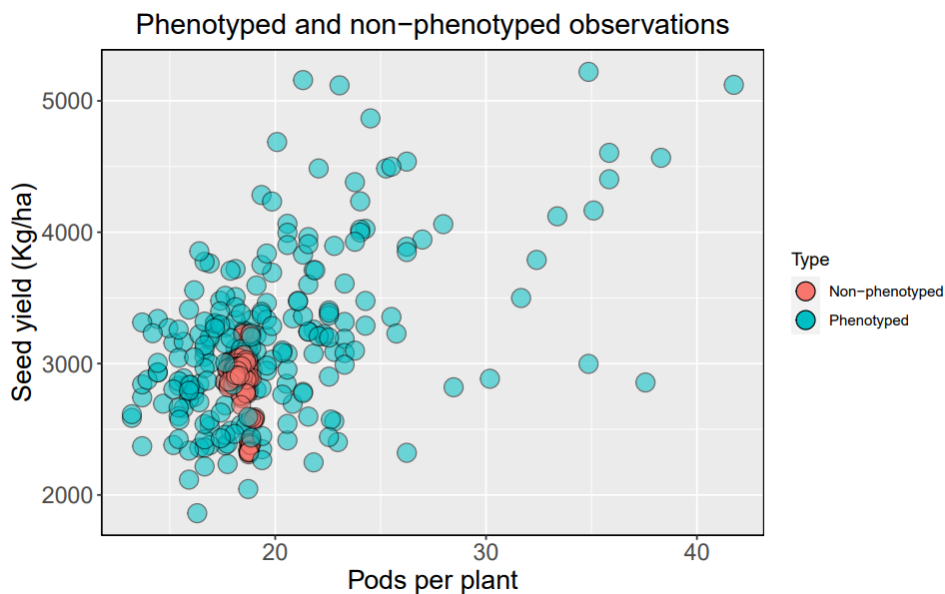

747

748 Supplementary Figure S4. Distribution of phenotyped and predicted non-phenotyped accessions  
749 for seed yield and number of pods per plant in the USDA germplasm collections

750

751

752

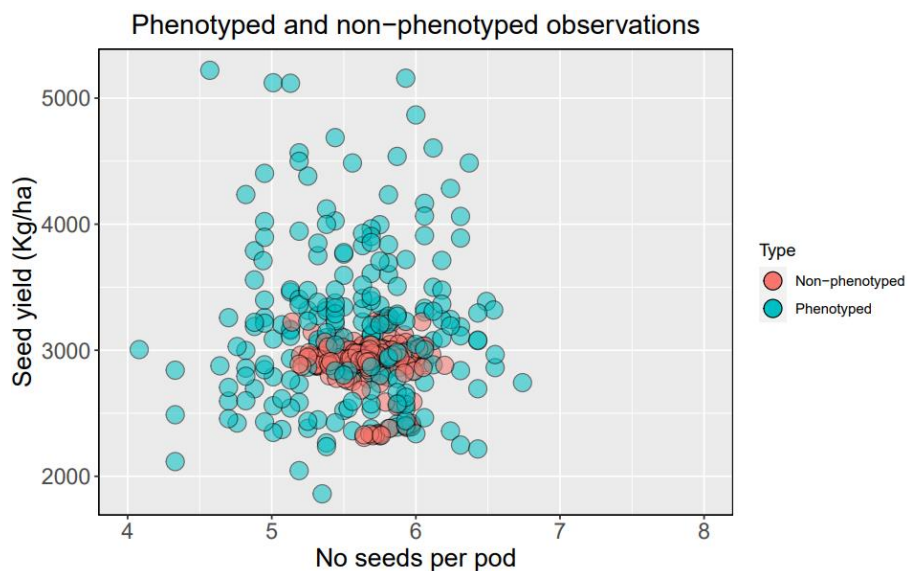

753

754 Supplementary Figure S5. Distribution of phenotyped and predicted non-phenotyped accessions  
755 for seed yield and number of seeds per pod in the USDA germplasm collections
